# Supplementary material for: High failure rates of protease inhibitor-based antiretroviral treatment in rural Tanzania – A prospective cohort study
Source: PLoS One. 2020 Jan 13;15(1):e0227600. doi: 10.1371/journal.pone.0227600 (PMC6957142; doi:10.1371/journal.pone.0227600)
Supplement: S1 Dataset — (XLSX) [file pone.0227600.s003.xlsx]

## Sheet: data
study_number	clinical_failure	immunological_failure	virologic_failure	sex	1a30	1a	1b	1c	1d	1e	1f	1g	1x	abc+3tc+efv	abc+3tc+nvp	azt+3tc	total_switches_1st_line	age_switch	duration_years_nnrti	art_regimen_2ndline	pregnant	functional_status	who_stage	bmi	cd4	timeframe1	vl_category1	nrti_mutation1	nnrti_mutation1	pi_mutation1	subtype1	timeframe2	vl_category2	nrti_mutation2	nnrti_mutation2	pi_mutation2	subtype2	timeframe3	vl_category3	nrti_mutation3	nnrti_mutation3	pi_mutation3	subtype3	timeframe4	vl_category4	nrti_mutation4	nnrti_mutation4	pi_mutation4	subtype4
1				Female		1				1							3	40	6.8	2f=TDF+FTC+LPV/r	0	Working	1	16.9407								288	0	.	.									1302	0
2	No	Yes	Yes	Female													4	19	0.5	AZT+3TC+ATV/r				21.8146	2							279	3	0	G190A, K238T	0	D	279	3	0	G190A, K238T	0	D	589	0
3	No	Yes	No	Female			1										4	37	0.2	2f=TDF+FTC+LPV/r	0	Working		19.8237								215	0	.	.			105	0					1273	0
4	No	Yes	No	Female						1							5	16	2.8	AZT+3TC+LPV/r	0	Working	3	18.8951	84	-1	3	M184V, K219Q	K103N, K238T	0	A	190	0	.	.			190	0					713	3	K219Q	K103N, K238T	0	A
5				Female	1	1	1										10	43	7.6	TDF+FTC+ATV/r	0	Working	1	22.9814	276	-56	3	K70KR	A98G, K103KN	0	A	217	0	.	.									582	0
6				Female		1											9	46	5.5	2a=ABC+ddI+LPV/r	0	Working	1	22.8532								321	0	.	.									1426	0
7				Male	1	1	1		1								10	54	7	TDF+FTC+ATV/r		Working	1	24.4541	432	-1	1					194	3	K70R, M184V, K219Q	Y181C	0	C							739	0
8	No	No	Yes	Male		1	1	1									12	14	8.2	2f=TDF+FTC+LPV/r		Working	4		324	-1	0					233	0	.	.
9				Male		1	1	1		1		1					8	23	9	ABC+3TC+ATV/r		Working	1		335	-2	0					175	0	.	.
10				Male		1	1	1									11	57	7.1	2f=TDF+FTC+LPV/r		Working	4	16.0037	113	-22	0					328	0	.	.
11				Female			1										6	38	0.4	TDF+FTC+ATV/r	0	Working	4	21.889	270	-162	0					293	0	.	.									753	0
12				Female		1		1	1								11	46	5.8	2f=TDF+FTC+LPV/r	0	Working	3	18.2222	406							163	0	.	.									940	3	0	K103N, P225PH	0	C
13				Male		1	1										6	39	6.2	2f=TDF+FTC+LPV/r		Working	4	22.3081								323	0	.	.
14	No	Yes	No	Male						1							5	45	0.1	AZT+3TC+ATV/r		Working	1	28.7775	143	-31	3	0	K103N	0	C	279	3	0	K103N	0	C	279	3	0	K103N	0	C
15				Female						1		1					5	35	2.1	AZT+3TC+ATV/r	0	Working	2	22.719	261	-158	0					283	0	.	.									466	0
16				Male		1	1										8	47	6.8	TDF+FTC+ATV/r		Working	1	19.1406	241							193	0	.	.									844	0
17				Male	1	1	1										6	40	7.4	2f=TDF+FTC+LPV/r		Working	1	22.5024	301	-161	3					294	0	.	.									763	0
18				Female							1	1					4	53	0.2	TDF+FTC+ATV/r	0	Working	3	19.1075	656	-78	3					231	0	.	.
19				Female				1									4	10	3.5	2e=TDF+3TC+LPV/r	0	Working	2		381							229	0	.	.									689	0
20				Female		1	1					1					7	60	8.6	ABC+3TC+ATV/r	0	Working	4	18.6224	473	-92	0					292	3	.	.
21				Female		1	1	1	1	1	1	1					13	46	8.4	AZT+3TC+LPV/r	0	Working	3	19.2716	209	-43	0					287	0	.	.									380	0
22	No	Yes	Yes	Male			1										4	50	6.2	TDF+FTC+ATV/r		Working	1	20.0773	105	0	3	0	0	0	C+D	200	0	.	.			573	3					573	3
23				Female		1	1	1									6	46	5.8	2f=TDF+FTC+LPV/r	0	Working	4	26.0562		-165	0					357	0	.	.									1273	0
24				Female		1	1		1								9	40	3.8	2a=ABC+ddI+LPV/r	0	Working	4	1.54006		-102	3					328	0	.	.
25				Male		1											12	32	4	2a=ABC+ddI+LPV/r		Working	3	19.8914	31							344	0	.	.									1994	0
26				Female		1	1										9	42	7.2	TDF+FTC+ATV/r	0	Working	4	17.7939	280	-191	0					216	0	.	.									759	3
27				Female		1	1					1					11	28	8.8	AZT+3TC+ATV/r	0	Working	1	24.098								229	0	.	.									277	0
28	No	Yes	No	Male	1	1	1										9	43	6.7	2f=TDF+FTC+LPV/r		Working	4	18.4444	87							364	3	M41L,V75VM,M184V,T215F	V108I, Y181C, H221Y	0	C+D	52	0
29				Male		1				1		1					11	51	7.2	AZT+3TC+ATV/r		Working	3	21.8248	328	-15	0					186	0	.	.									817	0
30				Male			1	1									4	10	8	2f=TDF+FTC+LPV/r		Working	3		717	0	3	D67N, K70R, M184V	K103N, P225H	0	C	194	0	.	.									547	0
31	No	No	Yes	Male		1		1				1					7	13	8.1	ABC+3TC+ATV/r		Working	2		685	-53	0					276	0	.	.			93	0
32	No	No	Yes	Male		1		1		1		1					10	22	5.8	TDF+FTC+ATV/r		Working	4		398	-141	0					210	0	.	.			111	0					552	1
33	No	Yes	Yes	Female			1	1									10	35	6.3	2f=TDF+FTC+LPV/r	0	Working	1	22.0479	214							286	0	.	.			1013	0					1196	0
34				Male			1	1	1								6	55	7.8	2f=TDF+FTC+LPV/r		Ambulatory	4	19.1448	181	-32	1					242	0	.	.									607	0
35				Female		1		1									10	35	6.8	2a=ABC+ddI+LPV/r	0	Working	1	20.2546								327	0	.	.									1504	0
36				Female		1	1	1									8	18	5	TDF+FTC+ATV/r	0	Working	2		569	-33	3	T69N	L100V, K103S, Y181C	0	A	183	0	.	.
37				Female								1					5	25	0	TDF+FTC+ATV/r	1	Working	1	20.3556	375	-7	0					199	0	.	.									616	2
38				Male		1	1	1			1	1					9	49	7.2	2f=TDF+FTC+LPV/r		Working	3	19.8568		-91	3					277	0	.	.									461	0
39				Female			1	1	1								7	10	7.9	2f=TDF+FTC+LPV/r	0	Working	4		761	-147	3	K70R, M184V, K219Q	K103N, V108I, K238T	0	A	228	0	.	.									589	0
40	No	No	Yes	Female		1		1	1	1							10	37	5.7	2f=TDF+FTC+LPV/r	0	Working	2	21.4908	311	-16	3	M41L, L74LV, M184V, T215Y	K103S, V179T, G190AS, K238KT	0	A	286	0	.	.			1028	0					1204	0
41				Female		1	1										5	50	7.9	TDF+FTC+ATV/r	0	Working	4	33.5635	146	-60	3	D67N, K70R, M184V, T215F, K219Q	V108I, Y181C, H221Y	0	C	224	0	.	.									492	0
42				Male		1											6	46	5.6	2a=ABC+ddI+LPV/r		Working	3	19.0311								302	0	.	.									1415	0
43				Female		1											6	50	4.2	2a=ABC+ddI+LPV/r	0	Working	3	19.6889								253	0	.	.									1660	0
44				Female		1		1									8	16	5.9	TDF+FTC+ATV/r	0	Working	2			-153	3	0	K103N, Y188L	0	C	205	0	.	.									577	0
45				Female				1									3	48	6.5	2f=TDF+FTC+LPV/r	0	Working	4	24.0218	86	-30	3					203	0	.	.									667	2
46				Male			1	1						1			7	41	8.4	2f=TDF+FTC+LPV/r		Ambulatory	3	17.2548	419	-1	3	L74V, M184GLRV	K103N, E138G, Y181HQ, Y188E, P225H	0	D	337	3	.	.
47	No	Yes	No	Male		1	1			1							12	18	4.9	2x=Other2ndline		Working	4		101	-7	0					266	0	.	.									1033	0
48				Male		1	1	1		1		1					13	15	7.7	AZT+3TC+ATV/r		Working	4			-165	3	M184V	K103N, V108IV	L10V	B/D	293	0	.	.
49				Female		1	1	1	1								10	42	8.1	TDF+FTC+ATV/r	0	Working	4	30.2222		-106	0					294	0	.	.
50	No	No	Yes	Male				1	1								5	9	6.6	2f=TDF+FTC+LPV/r		Ambulatory	4		675	-101	1					275	0	.	.			94	0					717	0
51	No	Yes	No	Male			1	1									6	34	5.8	2f=TDF+FTC+LPV/r		Ambulatory	4	19.0264	5							261	0	.	.			261	0					1036	0
52				Male			1	1									13	74	4.9	2a=ABC+ddI+LPV/r		Working	3	20.3659								284	0	.	.
53				Male				1									3	67	6.4	TDF+FTC+ATV/r		Working	3	22.3438		-178	0					283	0	.	.
54				Female		1	1	1		1							7	54	6.6	2f=TDF+FTC+LPV/r	0	Working	4	18.2726	201	-77	0					298	3	.	.
55	No	Yes	No	Male		1	1					1					7	57	6.9	TDF+FTC+ATV/r		Ambulatory	4	22.913	314							173	0	.	.			173	0					265	0
56				Female		1	1										4	36	6.5	2f=TDF+FTC+LPV/r	0	Working	3	21.0956		-99	0					223	0	.	.									771	0
57				Male		1		1	1								20	49	4.5	2a=ABC+ddI+LPV/r		Working	3	19.9481		-1	3	M184V	K103N, P225H	0	D	189	0	.	.									1379	0
58				Female		1	1			1		1					11	41	7	AZT+3TC+ATV/r	0	Working	1	29.8735	183	-2	1					224	0	.	.
59	No	Yes	No	Male		1	1	1									11	41	4.8	2x=Other2ndline		Working	2	18.75	107	-73	0					199	0	.	.			104	0					916	0
60	No	No	Yes	Female				1									5	11	6	2f=TDF+FTC+LPV/r	0	Working	2		503							357	0	.	.			83	0					907	3	M41L	0	0	A
61	No	Yes	No	Female	1	1											9	42	4.6	2a=ABC+ddI+LPV/r	0	Ambulatory	4	14.1103		-45	3	K70N, V75M	E138Q, G190A, Y318F	0	D	201	3	K70KN, V75VIM, M184MV	E138Q, G190A, Y318F	0	D	201	3	K70KN, V75VIM, M184MV	E138Q, G190A, Y318F	0	D	699	3	0	E138Q, G190A, Y318F	0	D
62				Female		1		1									11	38	6.2	TDF+FTC+ATV/r	0	Working	3	27.7211	364	-15	0					335	0	.	.									844	0
63				Female		1	1		1								14	37	5.4	2f=TDF+FTC+LPV/r	0	Working	3	22.8862	33	-114	0					271	0	.	.
64				Female		1	1										8	53	4.4	2a=ABC+ddI+LPV/r	0	Working	3	24.2452								250	0	.	.									1345	0
65				Female		1	1		1								12	17	5.5	TDF+FTC+ATV/r	0	Working	2		148	-1	3	0	K101E, Y181C, H221Y	0	C	363	3	0	Y181C, H221Y	0	C
66				Female		1											3	35	0.5	2a=ABC+ddI+LPV/r	0	Working	1									182	0	.	.
67				Female								1					5	32	0.1	AZT+3TC+LPV/r	0	Working	1	25.2237	375							309	0	.	.									946	0
68	Yes	Yes	No	Male				1									7	51	7.2	TDF+FTC+ATV/r		Ambulatory	3	25.7813	2	-4	3					190	0	.	.									346	0
69				Female		1	1										8	37	4.7	2f=TDF+FTC+LPV/r	0	Working	2	17.5453	2	-173	0					306	0	.	.									1231	3	0	K103N	0	C
70				Female		1	1		1								14	38	6.1	2f=TDF+FTC+LPV/r	0	Working	4	20.5159	214							186	1	.	.									726	0
71				Female		1				1		1					5	34	7.5	AZT+3TC+ATV/r	0	Working	1	16.703	358	-1	1					172	0	.	.
72				Male						1		1					8	56	1.7	AZT+3TC+ATV/r		Working	1	20.7214	271	-20	0					184	0	.	.									836	0
73	No	Yes	No	Male		1				1							15	49	3.6	2a=ABC+ddI+LPV/r		Working	3	16.4755								296	0	.	.			296	0					1643	3	D67G, T69D, K70R, M184V, K219Q	K101E, V108I, Y181C, G190A, H221Y	M46I, I50L, I54A, V82A, L24I	D
74				Female		1	1										5	31	6.3	TDF+FTC+ATV/r	0	Ambulatory	3	19.1406	18	-14	3	0	0	0	C	193	0	.	.									592	0
75				Female				1									7	20	4.2	2a=ABC+ddI+LPV/r	0	Working	4	22.6757		-56	3	M184V	K103N, V106M,	0	C+D	264	0	.	.
76				Female		1		1									6	53	3.7	2f=TDF+FTC+LPV/r	0	Working	3	23.4221	154	-59	0					312	0	.	.									1307	0
77				Male		1		1									5	9	6.8	2f=TDF+FTC+LPV/r		Working	2		406	-178	3	M184V	K103N, E138A, P225H	0	C	341	3	.	.
78				Female		1	1										5	46	5.7	TDF+FTC+ATV/r	0	Working	1	34.403	293	0	0					208	2	.	.									768	0
79	No	Yes	No	Male		1	1										10	42	5.4	2f=TDF+FTC+LPV/r		Working	2	18.7069	108							274	0	.	.			88	3	M41L, D67N, M184V, L210W, T215Y	K103N, E138Q	0	C	1027	3	D67N	K103N	L10F, M46I, L76V, V82A, I84IV	C
80				Male		1	1	1									7	22	7.6	TDF+FTC+ATV/r		Working	2		205	-183	3	M184V	A98G, Y181C	0	C	174	0	.	.
81				Male		1	1										4	9	6.8	2f=TDF+FTC+LPV/r		Working	3		1166	-31	2					246	3	.	.
82				Female				1									5	53	1.4	2e=TDF+3TC+LPV/r	0	Working	1	26.1674	6							276	0	.	.									1123	0
83				Male		1											4	51	4.2	2g=ABC+3TC+LPV/r		Working	4	26.0602	191	-63	3					203	0	.	.									1334	2
84				Female				1									3	44	3.2	2f=TDF+FTC+LPV/r	0	Working	3	15.625	149							336	0	.	.									1310	0
85				Male				1									3	23	2.1	2f=TDF+FTC+LPV/r		Working	3	20.5347		-39	0					252	3	0	0	0	C							462	1
86	No	Yes	Yes	Male		1											12	22	4.1	2a=ABC+ddI+LPV/r												299	0	.	.			658	0					1399	3	M184V	Y181C, H221Y	0	A
87				Female		1	1										6	34	6.1	TDF+FTC+ATV/r	0	Working	2	22.8125	123	0	0					286	0	.	.									663	0
88				Female				1									3	43	6.5	2f=TDF+FTC+LPV/r	0	Working	3	22.9688	284	-32	0					349	0	.	.
89				Male		1	1			1		1					10	45	6.1	AZT+3TC+ATV/r		Working	3	18.125	11	-58	3	L74V, M184V	L100I, K103N, V108I	0	A	201	1	.	.									596	1
90				Female		1	1		1								8	36	6.2	TDF+FTC+ATV/r	0	Working	2	21.7711	118							174	2	.	.									540	1
91				Male			1										3	8	6.5	2f=TDF+FTC+LPV/r		Working	2		587	-5	2					180	0	.	.									372	0
92	No	Yes	No	Male				1									7	53	4.1	2f=TDF+FTC+LPV/r		Working	2	21.8724	236	-42	0					213	0	.	.			944	0					1320	0
93	No	Yes	No	Female		1	1										4	30	6.3	TDF+FTC+ATV/r	0	Working	3	20.3156		-123	2					240	0	.	.			420	0					420	0
94	No	Yes	Yes	Male		1	1										4	56	7	TDF+FTC+ATV/r		Working	3	19.3792		0	0					224	0	.	.			224	0
95				Female			1	1				1					7	27	5.6	AZT+3TC+ATV/r	0	Working	2	18.4444	19	-28	3	M41L, M184V, L210W, T215F	K103N, V108I, Y181C, H221Y, K238T	0	D	173	1	.	.
96	Yes	Yes	No	Male		1	1										11	44	4.6	TDF+FTC+ATV/r		Working	3	17.7509	148	-176	0					195	0	.	.			885	3					1070	0
97				Male			1	1									10	50	3.8	2f=TDF+FTC+LPV/r		Working	3	23.0469	202							222	0	.	.									1343	0
98	No	Yes	Yes	Female		1	1										4	34	5.2	2f=TDF+FTC+LPV/r	0	Working	2	24.7992	202	-15	0					260	0	.	.			506	0					597	0
99				Female		1	1		1								7	16	6.1	AZT+3TC+LPV/r	0	Working	2		621	-183	3	K65R	L100F, K103N, V106M, E138A	0	D/C	318	0	.	.									516	0
100				Female	1	1	1										6	6	5.1	2f=TDF+FTC+LPV/r	0	Working	3		166	-39	3	M41L, E44D, D67N, T69D, M184V, L210W, T215Y	G190A	0	C	236	0	.	.
101				Female			1										3	29	1.2	2f=TDF+FTC+LPV/r	1	Working	1	25.1307		-107	0					305	0	.	.									396	0
102				Female		1	1	1									10	34	4	2f=TDF+FTC+LPV/r	0	Working	1	16.4063	89	-2	3	M41L, D67N, V75I, M184V, T215F, K219W	V106M, G190AT	0	C	347	0	.	.									978	0
103	No	Yes	No	Male		1	1	1									9	49	4.3	AZT+3TC+LPV/r		Working	4	20.881								162	0	.	.			162	0
104				Male			1										4	13	3.1	2f=TDF+FTC+LPV/r		Working	2		227	-177	3	M41L, E44D, V75VA, M184V, T215Y	V179D, Y181C	0	C+D	301	2	.	.									481	2
105				Female		1		1									8	38	5.3	2f=TDF+FTC+LPV/r	0	Working	4	36.8778	131							250	0	.	.
106				Male		1	1	1									8	46	4.1	2f=TDF+FTC+LPV/r		Working	2	25.7287	237	-183	0					295	0	.	.									1017	0
107	No	Yes	No	Female		1	1										6	6	5.7	2f=TDF+FTC+LPV/r	0	Working	3			-91	3					180	0	.	.			180	0					545	0
108				Male			1	1									13	62	2.9	2a=ABC+ddI+LPV/r		Working	2	19.3222								342	0	.	.									1516	0
109	No	Yes	Yes	Female		1	1	1									6	7	5	2f=TDF+FTC+LPV/r	0	Working	4		766	-31	3					343	0	.	.			165	0					585	0
110	No	Yes	No	Male		1	1	1	1								8	5	4.1	2e=TDF+3TC+LPV/r		Working	4		53	-9	0					308	0	.	.									1016	0
111				Male				1									7	13	4.9	TDF+FTC+ATV/r		Working	3		688	-31	0					274	0	.	.									743	0
112				Female			1										4	9	3.3	2f=TDF+FTC+LPV/r	0	Working	3			-121	3	M184V	A98G, Y181C	0	K/C	239	0	.	.									422	3	0	0	0	C
113				Male		1				1		1					7	56	4.3	TDF+FTC+ATV/r		Working	3	29.8438	269	-182	3					182	2	.	.									366	0
114				Female				1				1					4	43	6.1	TDF+FTC+ATV/r	0	Working	3	21.3504	88	-2	3					187	2	.	.									278	0
115				Male		1	1										8	64	4.5	TDF+FTC+ATV/r		Working	1	19.7222	281	-1	0					315	0	.	.									967	0
116				Male			1	1									4	43	5.7	2f=TDF+FTC+LPV/r		Working	3	24.452	341	-1	0					195	3	.	.
117				Female		1				1		1					10	42	6	AZT+3TC+ATV/r	0	Working	3	19.4667	23	-146	0					318	3	K65R, M184V	V106M, V108I, Y181C, G190A, H221Y	0	C
118				Male		1	1	1									6	13	5.7	TDF+FTC+ATV/r		Working	2		454	-92	1					176	0	.	.									364	0
119				Female		1	1			1		1					6	63	6	TDF+FTC+ATV/r	0	Working	1	19.6503	206	-1	3	D67N, K70R, M184V, K219E	A98G, K103N, Y181YC	0	A	184	0	.	.
120	No	Yes	No	Male				1									8	10	2.9	2e=TDF+3TC+LPV/r		Working	2		244	-147	3	M184V, T215Y	K103N, V108VI	0	A	210	0	.	.			3	1					1093	0
121				Male				1									9	44	2.5	2a=ABC+ddI+LPV/r		Working	1	22.7244								271	0	.	.									1454	0
122	No	Yes	No	Female				1									10	34	0.5	2a=ABC+ddI+LPV/r		Working	1	30.6292		-2	0					337	0	.	.			337	0					1314	3
123				Female		1	1										8	6	4.9	2f=TDF+FTC+LPV/r	0	Working	3		1114	-84	3	M184V, T215Y	E138G, Y181V	0	C	183	1	.	.									552	0
124				Male			1	1									6	15	5.5	2f=TDF+FTC+LPV/r		Working	2		452	-90	2					210	0	.	.
125				Female			1					1					8	27	5.1	AZT+3TC+ATV/r	0	Working	1	21.2279	71	-84	3	K65KR, M184I	K101E, V106M, E138A, G190A	0	C	273	0	.	.
126	No	Yes	Yes	Female				1									5	34	2.3	2a=ABC+ddI+LPV/r	0	Working	2	32.1625								280	0	.	.			848	0					1324	3
127				Male			1										3	7	5.2	2g=ABC+3TC+LPV/r		Working	3			-99	0					324	0	.	.
128	No	Yes	No	Male			1	1									6	14	3.5	2f=TDF+FTC+LPV/r		Working	3		126	-64	3	M41L, M184V, T215F	K101H, K103N, E138A, G190A	0	C	195	0	.	.			195	0					727	0
129	No	Yes	No	Female				1									6	31	3.4	2f=TDF+FTC+LPV/r	0	Working	3	21.7778	256	-182	0					180	3	K70R, M184V, K219KQ	A98G, K103N,	0	A	180	3	K70R, M184V, K219KQ	A98G, K103N,	0	A	1005	0
130	No	Yes	Yes	Male		1											2	5	3.3	2f=TDF+FTC+LPV/r		Working	3		186	-101	3	M41ML, D67G, V75I, M184V, T215Y	V179D, Y181C, H221Y	0	C	257	0	.	.			82	0					1063	0
131				Male						1		1					4	49	1.2	AZT+3TC+ATV/r		Working	1	21.4357	126	-104	0					217	0	.	.
132	No	No	Yes	Male		1	1			1							9	6	4.1	2f=TDF+FTC+LPV/r		Working	2		759	-59	0					179	0	.	.			179	0					720	0
133				Male				1									4	51	3.8	TDF+FTC+ATV/r		Working	3	18.8423	181	-45	0					181	0	.	.									805	0
134				Female		1	1	1									9	66	5.2	ABC+3TC+ATV/r	0	Working	1	25.9215		-92	0					272	0	.	.
135				Female	1	1	1			1							9	45	3.9	2f=TDF+FTC+LPV/r	0	Working	3	20.1333	143	-131	3	0	V108I, V179D, Y181C	0	C	238	0	.	.									763	0
136				Female				1									3	55	4.7	2f=TDF+FTC+LPV/r	0	Working	2	23.1481	221	-34	0					303	0	.	.									399	0
137	No	Yes	No	Male				1									4	57	1.6	2a=ABC+ddI+LPV/r		Working	2	22.5921	66							177	0	.	.			875	0					875	0
138				Male		1		1									7	26	4.7	TDF+FTC+ATV/r		Working	2	21.2585	59							314	0	.	.									315	0
139				Female		1	1	1		1		1					9	41	3.4	TDF+FTC+ATV/r	0	Working	3	27.0062	228							325	0	.	.
140				Male		1	1										4	5	4.2	2f=TDF+FTC+LPV/r		Working	3			-91	3	M184V	K103N	0	A	360	0	.	.									540	0
141				Female			1	1									5	23	3.2	2f=TDF+FTC+LPV/r	0	Working	1	28.7277	436	-29	3	M184V	K103N, V108I, H221Y	0	C	293	0	.	.									694	3
142				Male				1		1							11	56	3.2	TDF+FTC+ATV/r		Ambulatory	3	16.5961	219	-58	0					172	0	.	.									720	0
143	No	Yes	No	Female				1									14	28	1.5	2a=ABC+ddI+LPV/r	0	Working	3	27.1918	39	-14	0					359	0	.	.			124	0					1198	0
144				Female					1	1		1					8	37	4.4	AZT+3TC+ATV/r	0	Working	3	26.3146	234	-89	0					297	0	.	.
145				Male			1	1									5	10	3.7	2f=TDF+FTC+LPV/r		Working	3		344	-42	0					310	3	.	.									492	2
146				Male			1	1									8	6	2	2f=TDF+FTC+LPV/r		Working	3		614	-21	0					341	0	.	.
147				Male				1									4	33	4.2	2x=Other2ndline		Working	1	22.4609	118							326	0	.	.
148	No	Yes	No	Female		1	1	1	1		1	1					15	45	2.4	AZT+3TC+ATV/r	0	Working	3	17.8571	174	0	2					231	0	.	.			231	0					827	0
149				Male			1	1		1		1					7	14	2.8	2f=TDF+FTC+LPV/r		Working	3									270	3	0	0	0	A							467	1
150				Female		1	1										6	32	3.7	TDF+FTC+ATV/r	0	Working	1	22.4245	251							212	0	.	.									709	1
151				Male		1											3	9	2.3	2x=Other2ndline		Working	2		48	-103	3	E44D, K70E V75A, M184Deletion, T215TNSY	V106M, Y181Deletion, Y188Deletion, G190Deletion, F227L	0	C	229	0	.	.									784	0
152				Female								1					3	49	2.1	AZT+3TC+ATV/r	0	Working	1	20.5442	303	-1	0					176	0	.	.
153				Male		1	1	1									7	5	3.1	2g=ABC+3TC+LPV/r		Working	4		1431							350	0	.	.
154				Female				1		1							7	42	2.7	2f=TDF+FTC+LPV/r	0	Working	2	22.3418	77	-133	0					264	0	.	.									684	0
155				Female			1	1				1					11	15	3.2	TDF+FTC+ATV/r	0	Working	3		436	-87	0					286	0	.	.
156				Male			1			1		1					5	55	4.1	AZT+3TC+ATV/r		Working	1	19.6511	247	-1	3	K65R, L74I, Y115F, M184V	K103N, V108I, Y181C	0	C	207	0	.	.
157				Female		1	1										6	33	1.5	2f=TDF+FTC+LPV/r	0	Working	4	24.7934	61	-187	3					203	0	.	.
158				Male		1	1										6	42	2.6	2f=TDF+FTC+LPV/r		Working	3	18.7601	126	-18	3	0	0	0	A	188	0	.	.
159				Male				1									5	42	2.1	TDF+FTC+ATV/r		Working	1	19.8286	106	-36	0					357	0	.	.									741	0
160				Female		1	1	1									6	18	3	2f=TDF+FTC+LPV/r	0	Working	1		464							277	3	M184V	K101E, G190A	0	C+D							469	3
161				Female						1		1					6	42	3.1	2f=TDF+FTC+LPV/r	0	Working	2	18.1061		-1	0					365	0	.	.
162				Male			1	1									5	57	3.4	TDF+FTC+ATV/r		Working	3	24.3867		-99	3					273	0	.	.
163				Female			1	1								1	11	12	2	2f=TDF+FTC+LPV/r	0	Ambulatory	3		1009	-153	0					342	0	.	.									803	0
164	No	Yes	Yes	Female			1				1						8	15	2	TDF+FTC+ATV/r	0	Working	4		189	-46	0					287	0	.	.			115	0					667	0
165	No	Yes	Yes	Female				1		1		1					8	39	2.9	AZT+3TC+LPV/r	0	Working	3	23.5865	42	-177	0					331	0	.	.			43	0
166				Female		1	1										5	5	2.7	AZT+3TC+LPV/r	0	Working	4		1928	-48	3					268	3	.	.									531	3	0	A98G, V179FI, G190A	0	C
167				Female						1		1					6	42	1.7	AZT+3TC+ATV/r	0	Working	3	21.6041	169	-32	0					307	0	.	.									836	0
168				Female				1									7	43	1.3	TDF+FTC+ATV/r	0	Working	3	23.8319	71	-97	2					279	0	.	.									916	0
169	No	No	Yes	Male				1		1		1					9		1.8	AZT+3TC+ATV/r		Working	1	20.7545	80	-182	0					349	0	.	.			83	0					573	0
170	No	No	Yes	Female				1									4	56	1.7	AZT+3TC+ATV/r	0	Working	1	19.7168	116	-105	3	M184V	K103N, V108I, E138A, Y188L	0	C	211	3	M41ML, M184V	K103N, E138A, Y188L	0	C	113	3					855	0
171				Female				1									3	8	2.6	2f=TDF+FTC+LPV/r	0	Working	2									169	1	.	.
172				Male				1									3	9	2.7	2f=TDF+FTC+LPV/r		Working	3		294	-138	0					225	0	.	.									409	0
173				Male		1	1										8	5	2.5	AZT+3TC+LPV/r		Working	4		1565	0	0					186	0	.	.
174	Yes	Yes	No	Female				1		1		1					8	28	3.2	TDF+FTC+ATV/r	0	Ambulatory	3	21.4309	23	-100	3	K65R, K70T, M184V	V106M, E138A, Y188L	0	C	232	3	K65R, K70T, M184V	V106M, E138A, Y188L	0	C	63	3
175	No	Yes	Yes	Female						1		1					13	54	0.8	AZT+3TC+ATV/r	0	Working	4	21.5888	30	-186	0					277	0	.	.			277	0					937	0
176	No	Yes	No	Female				1									8	29	1	2f=TDF+FTC+LPV/r	0	Ambulatory	2	23.1848	80							172	0	.	.			172	0					939	0
177				Male			1							1			5	3	2.5	AZT+3TC+LPV/r		Working	3									258	0	.	.									443	0
178				Female			1	1									5	41	2.8	TDF+FTC+ATV/r	0	Working	1	26.0642		-95	0					292	0	.	.
179				Female						1		1		1			5	59	2.5	ABC+3TC+ATV/r	0	Working	1	22.7556	178	-1	0					174	3	.	.									387	0
180				Female						1		1					7	32	1.4	2f=TDF+FTC+LPV/r	0	Working	4	22.1855	21	-123	3	K65R, D67H, M184V, K219E	E138A, G190E	0	C	351	2	.	.
181	Yes	Yes	Yes	Female						1		1					13	35	0.9	AZT+3TC+ATV/r	0	Working	2	21.9076	25	-190	3	T69TADN,	L100I, Y181C	0	A	174	3	.	.			536	0					536	0
182	No	No	Yes	Male						1		1					4	45	2.5	ABC+3TC+ATV/r		Working	2	23.3333		-1	3	K65R, K70T, M184V	K101E, K103N, G190A	0	A	270	0	.	.
183				Male		1	1	1									5	7	4.4	2f=TDF+FTC+LPV/r		Working	4			-104	3	M184V	A98G, K103N	0	C	273	0	.	.									456	3
184	No	No	Yes	Female		1	1										8	39	8.6	2f=TDF+FTC+LPV/r	0	Working	3	20.4622	381							341	0	.	.			132	0					685	0
185				Female		1	1	1									9	11	7.7	TDF+FTC+ATV/r	0	Working	2		956	0	2					364	0	.	.									548	0
186				Female				1									11	46	0.5	2f=TDF+FTC+LPV/r	0	Working	4	14.8213	12							197	0	.	.									1245	0
187				Male			1										5	35	3	2f=TDF+FTC+LPV/r		Working	4	20.4082	220	-1	0					345	0	.	.									708	2
188				Female			1	1									4	37	0	2f=TDF+FTC+LPV/r	0	Ambulatory	2	20.8307								283	0	.	.
189	No	Yes	No	Male				1									3	59	2.1	TDF+FTC+ATV/r		Working		17.8926	120	-1	1					356	0	.	.			163	0					594	0
190	No	Yes	Yes	Male		1	1	1									6	16	2.9	TDF+FTC+ATV/r		Working	3		251	-34	0					337	3	0	K103N, E138Q	0	D	337	3	0	K103N, E138Q	0	D	490	0
191				Female				1		1	1	1					7	49	1.1	TDF+FTC+ATV/r	0	Working		21.3111	327	-176	3	0	K103N, Y188L	0	A	195	0	.	.									950	0
192				Female		1											4	46	8.1	2f=TDF+FTC+LPV/r				22.5391	390							252	0	.	.									796	0
193				Female		1	1										4	31	2.3	TDF+FTC+ATV/r	0	Working	3	17.6252	266	-56	0					339	0	.	.									696	0
194				Female			1										4	42	4.2	2f=TDF+FTC+LPV/r	0	Working	4	26.7804	116	0	1					189	0	.	.									548	0
195				Female				1									2	41	2.9	2f=TDF+FTC+LPV/r	0	Working		17.6252	12	-1	0					227	3	0	K103KN, V106VM	0	C
196	No	Yes	No	Male			1	1				1					11	15	1.2	TDF+FTC+ATV/r		Working			163	-64	3	D67N, K70R, L74LI, M184V, T215I, K219E	K103N, V108I	0	A	192	0	.	.			101	0					893	0
197				Female			1										2	46	0.5	2f=TDF+FTC+LPV/r	0	Working	2	17.6569		0	3	M41L, D67T, T69G, K70R, V75M, F77L, M184V, T215F, K219E	A98G, G190A	0	A	328	0	.	.
198				Female			1										2	34	1.8	AZT+3TC+LPV/r	0	Working	2	22.5832	18							218	0	.	.									583	0
199				Female			1										2	42	0.5	2f=TDF+FTC+LPV/r	0	Working	4	30.0391	487							287	3	.	.									504	0
200	No	Yes	No	Female													4	41	1.5	2a=ABC+ddI+LPV/r	0	Working		22.3757								185	0	.	.			381	0
201				Male								1					4	37	2.2	AZT+3TC+LPV/r		Working	2	22.6613		-101	2					364	0	.	.
202	No	Yes	Yes	Female								1					7	39	1.6	ABC+3TC+ATV/r	0	Working	2	19.7757	180	0	0					259	0	.	.			259	0
203				Male								1	1	1			5	17	2	2f=TDF+FTC+LPV/r		Working	3	15.8419	102	-1	3	K65R, M184V, K219Q	K103N, E138G, V179E, P225H, K238T	0	A	314	3	K65R, M184V, K219Q	K103N, E138G, V179E, P225H, K238T	0	A
204				Male				1									2	49	2.6	TDF+FTC+ATV/r		Working	3	23.6609	407	-76	3					302	3	0	0	0	D
205				Female													7	38	0.3	TDF+FTC+ATV/r				40.5827	276	0	0					365	0	.	.									909	0
206				Male													3	55	0	TDF+FTC+ATV/r				17.2799	14							181	0	.	.
207				Male						1							6	59	0	2f=TDF+FTC+LPV/r		Working	3	17.396	794	-63	3	0	0	0	A	231	0	.	.									1162	0
208				Female			1	1									4	9	1	2f=TDF+FTC+LPV/r	0	Working	3		184	-11	3	M184V, T215Y	K101P, G190A	0	A	196	0	.	.									682	0
209				Female								1					9	41	0.2	2x=Other2ndline	0	Bedridden	4	16.3333	109	-181	3	0	0	0	CRF10_CD	176	0	.	.									985	3
210	No	Yes	Yes	Male		1											4	3	2.1	2g=ABC+3TC+LPV/r		Working	4		65	-50	3	M184V	K101H, E138A, G190A	0	C	249	0	.	.			67	1					432	0
211				Female								1					6	31	0.8	AZT+3TC+ATV/r	0	Working	3	24.308	71	-102	2					265	2	.	.									356	0
212				Female								1					3	48	2.1	AZT+3TC+ATV/r	0	Working	4	26.3892		-98	2					275	0	.	.
213				Male				1		1		1					8	36	2.3	AZT+3TC+LPV/r		Working	1	23.2422	23	-160	3	L74I, Y115F, M184V	V106M, G190A	0	C	189	0	.	.
214				Female			1										3	3	1.7	2g=ABC+3TC+LPV/r	0	Working	4		1192	-35	0					289	0	.	.
215				Male								1					3	42	1.4	2f=TDF+FTC+LPV/r		Working	4	21.5645	84	-85	3					222	0	.	.									404	2
216				Female													1	2	0	AZT+3TC+LPV/r	0	Working	3		480							271	2											907	0
217				Female								1					5	22	0.6	AZT+3TC+LPV/r	0	Working	2	18.1787	74	-31	3					201	0	.	.
218				Female						1		1					4	16	1.3	AZT+3TC+ATV/r	0	Working	3		373	-53	3					255	0	.	.									290	0
219				Female								1					4	35	1.3	2f=TDF+FTC+LPV/r	0	Working	3	18.5975	119	-14	0					173	0	.	.									447	0
220				Female			1										3	3	1.2	2g=ABC+3TC+LPV/r	0	Working	4		925	-154	2					302	0	.	.
221				Male											1		5	1	0	2g=ABC+3TC+LPV/r		Working	3		1728							328	0	.	.									728	0
222				Female						1		1					4	32	1.1	2f=TDF+FTC+LPV/r	0	Working	1	24.2642	147	-84	3					288	0	.	.
223	Yes	Yes	No	Male						1		1					5	30	0.3	TDF+FTC+ATV/r		Ambulatory	4	23.4221								217	3	.	.			217	3
224				Female								1					4	50	0.1	TDF+FTC+ATV/r	0	Working	4	22.7273	381	-28	0					296	2	.	.									702	0
225				Female								1					4	45	0.7	AZT+3TC+LPV/r	0	Working	3	27.1111	25	-38	0					304	0	.	.									471	0
226				Male			1										6	14	0.1	TDF+FTC+ATV/r		Working	2		257	-27	0					312	0	.	.
227				Male													4	2	0	2g=ABC+3TC+LPV/r		Working	4		287							325	3	.	.									416	0
228				Female													4	5	0	2g=ABC+3TC+LPV/r	0	Ambulatory	4		4	-5	0					218	0	.	.									581	0
229				Female								1					5	37	0	AZT+3TC+ATV/r	0	Working	3	20.2289	215							193	0	.	.
230				Female								1					4	41	0	TDF+FTC+ATV/r	0	Working	2	17.5981	249	-17	3	0	0	0	D	314	0	.	.									663	2
231				Male				1						1			4	8	0.7	2f=TDF+FTC+LPV/r		Working	3		593	0	0					282	0	.	.
232				Male						1		1					6	39	1.4	AZT+3TC+LPV/r		Ambulatory	2	21.4844	36	-187	3					182	0	.	.
233				Male						1							2	35	0	2f=TDF+FTC+LPV/r		Working	1	19.3479	334	-8	3					346	0	.	.									438	0
234				Male													2	2	0	2g=ABC+3TC+LPV/r		Working	3		1095	-13	3	0	0	0	C	315	3	.	.
235				Female													4	2	0	2g=ABC+3TC+LPV/r	0	Working	3		772	-20	0					259	0	.	.
236				Female													1	0	0	2g=ABC+3TC+LPV/r	0	Working	1		2369							196	0	.	.
237				Female						1				1			3	14	7.8	2g=ABC+3TC+LPV/r	0	Working	4									210	0	.	.
238	No	Yes	No	Male													7	49	1.6	AZT+3TC+ATV/r		Working	4	16.9845	2							257	0	.	.									1078	1
239				Male				1									4	36	2.9	2a=ABC+ddI+LPV/r		Working	4	17.6708	1							269	0	.	.
240				Female													2	49	1.2	TDF+FTC+ATV/r	0	Working	3	20.8999	21	-38	0					298	0	.	.									655	0
241				Female						1		1					5	31	2.3	AZT+3TC+ATV/r	0	Working	3	21.6427	49	-1	3	K65R, M184V	L100I, K103N	0	C	190	0	.	.									727	0
242	No	Yes	No	Male						1							4	34	1.6	AZT+3TC+LPV/r		Working		19.8868	25	-2	0					318	0	.	.
243				Male													5	4	0	AZT+3TC+LPV/r		Working	4		2							365	0	.	.									1063	0
244	No	Yes	No	Female													5	28	1.3	TDF+FTC+ATV/r	0	Working	1	25.3154	23	-119	1					301	0	.	.			105	0					848	0
245				Female								1					3	24	0.1	TDF+FTC+ATV/r	0	Ambulatory	1	26.4889	359	0	0					335	2	.	.
246				Female													2	35	0	2f=TDF+FTC+LPV/r				20.4876								316	0	.	.									703	0
247				Female													2	50	0	2f=TDF+FTC+LPV/r				20.6612	43							185	0	.	.									1157	0
248				Female				1				1					6	57	1.9	2f=TDF+FTC+LPV/r	0	Ambulatory	3	26.8444		0	0					288	0	.	.									655	0
249				Male													1	47	0.5	AZT+3TC+ATV/r		Ambulatory	3	25.7901	7	-1	3					189	3	.	.
250				Male								1					3	43	1.4	AZT+3TC+ATV/r		Working	4	20.1951	18							175	3	.	.
251	No	No	Yes	Male													2	15	1.4	2g=ABC+3TC+LPV/r		Ambulatory	4		11	-1	3	M41L, A62AV, D67NS, K70R, L74I, M184V, T215Y, K219Q	A98G, Y181C, H221Y	0	A	246	0	.	.			246	0					499	0
252				Male				1	1								5	35	6.5	TDF+FTC+ATV/r		Working	3	23.3887	343	-37	0					294	0	.	.									510	3
[truncated: 12 more columns]

## Sheet: variables
	definition	variables
clinical_failure	by clinicians suspected failure	yes	no
immunological_failure	by clinicians suspected failure	yes	no
virologic_failure	by clinicians suspected failure	yes	no
sex		f	m
1a30	d4t-30+3tc+nvp	1
1a	d4t+3tc+nvp	1
1b	azt+3tc+nvp	1
1c	azt+3tc+efv	1
1d	d4t+3tc+efv	1
1e	tdf+ftc+efv	1
1f	tdf+ftc+nvp	1
1g	tdf+3tc+efv	1
1x	other1stline	1
abc+3tc+efv	abc+3tc+efv	1
abc+3tc+nvp	abc+3tc+nvp	1
azt+3tc	azt+3tc	1
total_switches_1st_line
age_switch		in years
duration_years_nnrti		in years
art_regimen_2ndline		different regimens
pregnant		yes	no
functional_status		working	ambulatory	bedridden
who_stage		I	II	III	IV
bmi
cd4		in mm^3
timeframe1	days from baseline to preswitch sample	in days
vl_category1	viral load category preswitch	0	1	2	3
nrti_mutation1		specific mutation
nnrti_mutation1		specific mutation
pi_mutation1		specific mutation
subtype1		subtype
timeframe2	days from baseline to 6-12 months sample	in days
vl_category2	viral load category 6-12 months sample	0	1	2	3
nrti_mutation2		specific mutation
nnrti_mutation2		specific mutation
pi_mutation2		specific mutation
subtype2		subtype
timeframe3	days from baseline to failure sample	in days
vl_category3	viral load category failure	0	1	2	3
nrti_mutation3		specific mutation
nnrti_mutation3		specific mutation
pi_mutation3		specific mutation
subtype3		subtype
timeframe4	days from baseline to long term sample	in days
vl_category4	viral load category long term	0	1	2	3
nrti_mutation4		specific mutation
nnrti_mutation4		specific mutation
pi_mutation4		specific mutation
subtype4		subtype
missed_daily_postswitch	self reported from patients	1	0
missed_weekly_postswitch	self reported from patients
missed_twice_monthly_postswitch	self reported from patients
missed_monthly_postswitch	self reported from patients
missed_never	self reported from patients
missed_NA	self reported from patients
missed_daily_preswitch	self reported from patients
missed_weekly_preswitch	self reported from patients
missed_2_monthly_preswitch	self reported from patients
missed_monthly_preswitch	self reported from patients
missed_never_preswitch	self reported from patients
missed_NA_preswitch	self reported from patients
